# Supplementary material
Source: Springer Nature journal article supplement (https://www.springermedizin.de/resource/supplementary/12889_2011_3863_MOESM2_ESM.pdf/9490838)

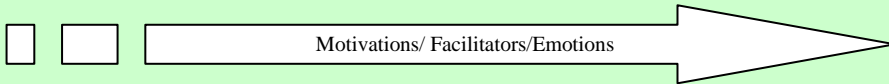

Level 1  
Processes

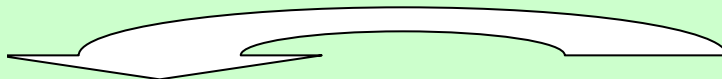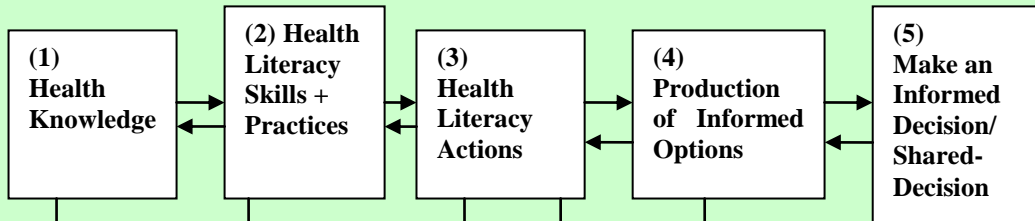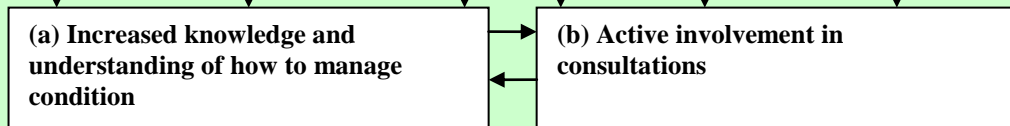

Level 2  
Outcomes

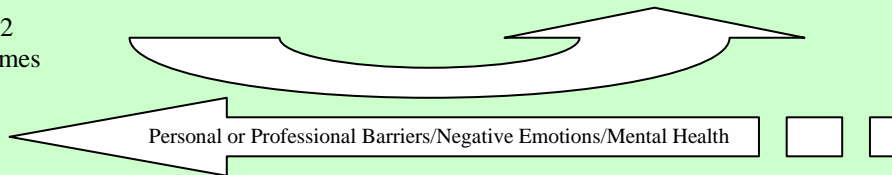

Supplement: MOESM2 [file 9490838]
